# Supplementary material
Source: Springer Nature journal article supplement (https://www.springermedizin.de/resource/supplementary/13098_2013_299_MOESM2_ESM.pdf/9671014)

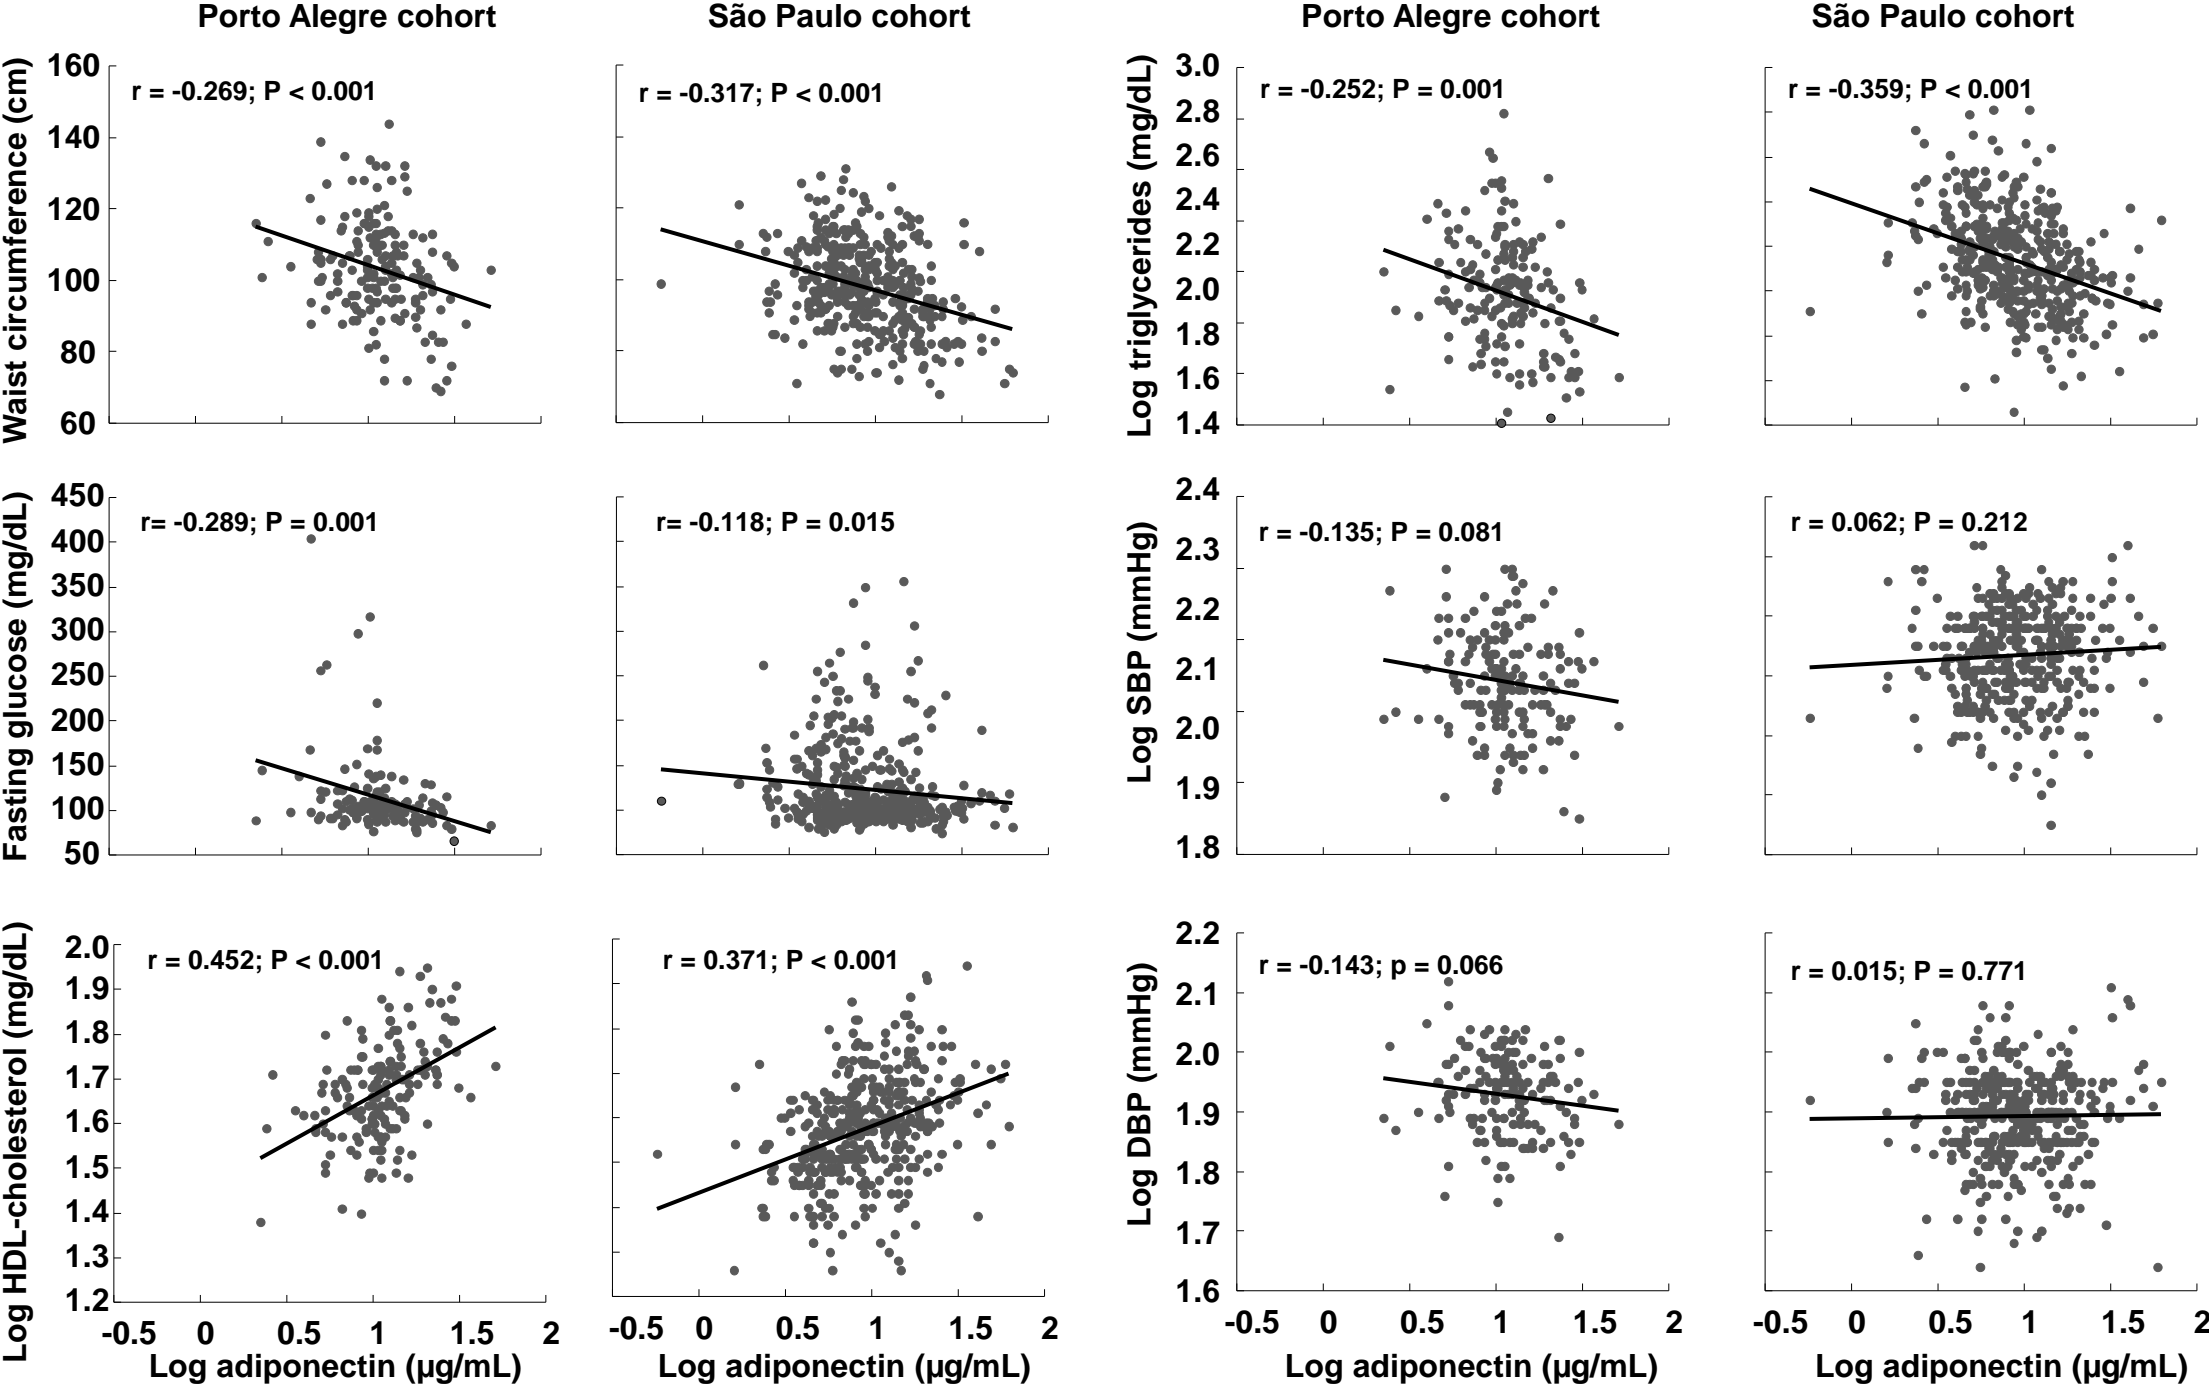

Supplement: MOESM2 [file 9671014]
